# Supplementary material for: Role of B‐Type Natriuretic Peptide and N‐Terminal Prohormone BNP as Predictors of Cardiovascular Morbidity and Mortality in Patients With a Recent Coronary Event and Type 2 Diabetes Mellitus
Source: PubMed Central journal article supplement — J Am Heart Assoc. 2017 May 29;6(6):e004743. doi: 10.1161/JAHA.116.004743 (PMC5669146; doi:10.1161/jaha.116.004743), 2017-05-29
Supplement: JAH3-6-e004743-s001.pdf [file JAH3-6-e004743-s001.pdf]

## **Supplemental material**

Table S1. Characteristics of all included patients grouped according to quartiles of BNP

|                                   | BNP (5-49 pg/ml)<br>n=1381 | BNP (50-105 pg/ml)<br>n=1383 | BNP (106-218 pg/ml)<br>n=1378 | BNP (218-4231 pg/ml)<br>n=1383 | P<br>value |
|-----------------------------------|----------------------------|------------------------------|-------------------------------|--------------------------------|------------|
| randomized to lixisenatide        | 666 (48.2%)                | 745 (53.9%)                  | 696 (50.5%)                   | 669 (48.4%)                    | 0.009      |
| age (yrs)                         | 56.7 ± 9.3                 | 59.5 ± 9.1                   | 61.3 ± 9.2                    | 63.5 ± 9.7                     | <0.001     |
| male (%)                          | 1019 (73.8%)               | 968 (70.0%)                  | 982 (71.3%)                   | 896 (64.8%)                    | <0.001     |
| BMI (kg/m <sup>2</sup> )          | 30.8 ± 5.7                 | 30.3 ± 5.8                   | 29.9 ± 5.6                    | 29.3 ± 5.6                     | <0.001     |
| Race                              |                            |                              |                               |                                | 0.020      |
| Asian                             | 204 (14.8%)                | 186 (13.4%)                  | 183 (13.3%)                   | 157 (11.4%)                    |            |
| Black                             | 57 (4.1%)                  | 44 (3.2%)                    | 33 (2.4%)                     | 55 (4.0%)                      |            |
| Other                             | 102 (7.4%)                 | 115 (8.3%)                   | 117 (8.5%)                    | 137 (9.9%)                     |            |
| White                             | 1018 (73.7%)               | 1038 (75.1%)                 | 1045 (75.8%)                  | 1034 (74.8%)                   |            |
| ethnicity – hispanic              | 375 (27.2%)                | 407 (29.4%)                  | 413 (30.0%)                   | 451 (32.6%)                    | 0.019      |
| Region                            |                            |                              |                               |                                | <0.001     |
| Africa/Near East                  | 86 (6.2%)                  | 71 (5.1%)                    | 58 (4.2%)                     | 54 (3.9%)                      |            |
| Asia Pacific                      | 184 (13.3%)                | 175 (12.7%)                  | 172 (12.5%)                   | 138 (10.0%)                    |            |
| Eastern Europe                    | 290 (21.0%)                | 332 (24.0%)                  | 377 (27.4%)                   | 414 (29.9%)                    |            |
| North America                     | 219 (15.9%)                | 181 (13.1%)                  | 181 (13.1%)                   | 135 (9.8%)                     |            |
| South and Centr. America          | 421 (30.5%)                | 438 (31.7%)                  | 449 (32.6%)                   | 516 (37.3%)                    |            |
| Western Europe                    | 181 (13.1%)                | 186 (13.4%)                  | 141 (10.2%)                   | 126 (9.1%)                     |            |
| Systolic blood pressure (mmHg)    | 128.4 ± 15.1               | 129.9 ± 17.0                 | 130.0 ± 17.8                  | 129.9 ± 19.3                   | 0.035      |
| Diastolic blood pressure (mmHg)   | 78.0 ± 9.2                 | 77.0 ± 9.6                   | 77.2 ± 10.5                   | 76.5 ± 10.8                    | 0.003      |
| heart rate (bpm)                  | 70.5 ± 9.9                 | 69.0 ± 10.3                  | 69.5 ± 10.5                   | 71.3 ± 10.9                    | <0.001     |
| current smoker                    | 194 (14.0%)                | 174 (12.6%)                  | 134 (9.7%)                    | 125 (9.0%)                     | <0.001     |
| former smoker                     | 656 (47.5%)                | 614 (44.4%)                  | 640 (46.4%)                   | 612 (44.3%)                    | 0.24       |
| Medical history                   |                            |                              |                               |                                |            |
| MI                                | 252 (18.2%)                | 299 (21.6%)                  | 314 (22.8%)                   | 393 (28.4%)                    | <0.001     |
| HF                                | 172 (12.5%)                | 245 (17.7%)                  | 304 (22.1%)                   | 514 (37.2%)                    | <0.001     |
| atrial fibrillation/flutter       | 30 (2.2%)                  | 63 (4.6%)                    | 96 (7.0%)                     | 172 (12.4%)                    | <0.001     |
| PAD                               | 65 (4.7%)                  | 86 (6.2%)                    | 111 (8.1%)                    | 151 (10.9%)                    | <0.001     |
| TIA                               | 29 (2.1%)                  | 33 (2.4%)                    | 23 (1.7%)                     | 42 (3.0%)                      | 0.11       |
| ventricular tachycardia           | 13 (0.9%)                  | 14 (1.0%)                    | 21 (1.5%)                     | 26 (1.9%)                      | 0.10       |
| stroke                            | 45 (3.3%)                  | 68 (4.9%)                    | 67 (4.9%)                     | 112 (8.1%)                     | <0.001     |
| CABG                              | 51 (3.7%)                  | 101 (7.3%)                   | 157 (11.4%)                   | 151 (10.9%)                    | <0.001     |
| implanted pacemaker               | 17 (1.2%)                  | 23 (1.7%)                    | 43 (3.1%)                     | 60 (4.3%)                      | <0.001     |
| carotid disease                   | 28 (2.0%)                  | 28 (2.0%)                    | 39 (2.8%)                     | 44 (3.2%)                      | 0.12       |
| hypertension                      | 1001 (72.5%)               | 1068 (77.2%)                 | 1062 (77.1%)                  | 1079 (78.0%)                   | 0.002      |
| Index event                       |                            |                              |                               |                                | <0.001     |
| STEMI                             | 458 (33.2%)                | 591 (42.7%)                  | 684 (49.6%)                   | 710 (51.3%)                    |            |
| NSTEMI                            | 591 (42.8%)                | 559 (40.4%)                  | 505 (36.6%)                   | 479 (34.6%)                    |            |
| UAP                               | 332 (24.0%)                | 233 (16.8%)                  | 189 (13.7%)                   | 194 (14.0%)                    |            |
| PCI treatment at index ACS        | 903 (65.4%)                | 906 (65.5%)                  | 870 (63.1%)                   | 727 (52.6%)                    | <0.001     |
| insulin-treated                   | 463 (33.5%)                | 539 (39.0%)                  | 555 (40.3%)                   | 602 (43.5%)                    | <0.001     |
| duration of diabetes (yrs)        | 7.8 ± 7.2                  | 9.2 ± 8.2                    | 9.4 ± 8.3                     | 10.7 ± 9.0                     | <0.001     |
| retinopathy                       | 122 (8.8%)                 | 134 (9.7%)                   | 141 (10.2%)                   | 194 (14.0%)                    | <0.001     |
| neuropathy                        | 215 (15.6%)                | 224 (16.2%)                  | 209 (15.2%)                   | 271 (19.6%)                    | 0.007      |
| asthma                            | 33 (2.4%)                  | 53 (3.8%)                    | 36 (2.6%)                     | 32 (2.3%)                      | 0.05       |
| COPD                              | 42 (3.0%)                  | 59 (4.3%)                    | 79 (5.7%)                     | 69 (5.0%)                      | 0.005      |
| HbA1c (%)                         | 7.7 ± 1.3                  | 7.7 ± 1.3                    | 7.7 ± 1.3                     | 7.7 ± 1.2                      | 0.64       |
| HDL(mg/dl)                        | 1.1 ± 0.3                  | 1.1 ± 0.3                    | 1.1 ± 0.3                     | 1.1 ± 0.3                      | 0.58       |
| LDL (mg/dl)                       | 2.1 ± 0.9                  | 2.0 ± 1.0                    | 2.0 ± 0.9                     | 2.0 ± 0.9                      | 0.17       |
| eGFR (ml/min/1.73m <sup>2</sup> ) | 82.6 ± 20.4                | 78.6 ± 20.8                  | 74.4 ± 21.0                   | 68.1 ± 20.2                    | <0.001     |
| Albuminuria                       |                            |                              |                               |                                | <0.001     |
| normoalbuminuria                  | 1134 (82.1%)               | 1074 (77.7%)                 | 1019 (73.9%)                  | 875 (63.3%)                    |            |
| microalbuminuria                  | 200 (14.5%)                | 249 (18.0%)                  | 269 (19.5%)                   | 345 (24.9%)                    |            |
| macroalbuminuria                  | 47 (3.4%)                  | 60 (4.3%)                    | 90 (6.5%)                     | 163 (11.8%)                    |            |
| Hemoglobin (g/dL)                 | 14.1 ± 1.4                 | 13.9 ± 1.3                   | 13.8 ± 1.4                    | 13.3 ± 1.5                     | <0.001     |
| Na (mmol/l)                       | 140.2 ± 2.7                | 140.3 ± 2.8                  | 140.5 ± 3.0                   | 140.5 ± 3.2                    | 0.033      |
| albumin (g/dl)                    | 41.6 ± 3.2                 | 40.9 ± 3.1                   | 40.4 ± 3.5                    | 39.3 ± 4.0                     | <0.001     |
| CRP (mg/dl)                       | 1.9 (1.8-2.0)              | 1.9 (1.8-2.0)                | 2.1 (2.0-2.3)                 | 2.4 (2.3-2.6)                  | <0.001     |
| BNP (pg/ml)                       | 28 (27-28)                 | 73 (72-74)                   | 150 (148-152)                 | 431 (419-443)                  |            |
| NT-proBNP (pg/ml)                 | 78 (74-81)                 | 208 (200-215)                | 470 (453-487)                 | 1541 (1468-1618)               |            |

Table S2. Linear regression of BNP and NT-proBNP with all variables listed in the model

|                                   | BNP                  | P value | NT-proBNP              | P value |
|-----------------------------------|----------------------|---------|------------------------|---------|
| randomized to lixisenatide        | 0.0 (-14.0, 14.0)    | 0.996   | 16.2 (-66.4, 98.8)     | 0.701   |
| age (yrs)                         | 1.9 (1.0, 2.9)       | <0.001  | 7.2 (1.6, 12.8)        | 0.012   |
| male (%)                          | 15.0 (-3.6, 33.6)    | 0.113   | 8.2 (-101.4, 117.9)    | 0.883   |
| BMI (kg/m <sup>2</sup> )          | -7.0 (-8.4, -5.6)    | <0.001  | -46.8 (-55.2, -38.4)   | <0.001  |
| Race                              |                      |         |                        |         |
| Black vs. white                   | 19.4 (-20.4, 59.2)   | 0.340   | 27.7 (-207.3, 262.8)   | 0.817   |
| Asian vs. white                   | -37.9 (-64.6, -11.2) | 0.005   | -225.1 (-382.7, -67.4) | 0.005   |
| other vs. white                   | -1.0 (-27.3, 25.4)   | 0.943   | 127.4 (-28.3, 283.2)   | 0.109   |
| ethnicity – hispanic              | 19.8 (0.7, 38.9)     | 0.042   | 169.9 (57.0, 282.8)    | 0.003   |
| Systolic blood pressure (mmHg)    | -1.0 (-1.6, -0.5)    | <0.001  | -5.3 (-8.6, -2.0)      | 0.002   |
| Diastolic blood pressure (mmHg)   | 1.3 (0.4, 2.2)       | 0.007   | 6.6 (1.1, 12.2)        | 0.019   |
| heart rate (bpm)                  | 2.1 (1.4, 2.8)       | <0.001  | 13.8 (9.7, 18.0)       | <0.001  |
| current smoker                    | -5.0 (-29.9, 19.8)   | 0.692   | -78.0 (-224.8, 68.8)   | 0.298   |
| former smoker                     | 3.0 (-13.0, 18.9)    | 0.717   | -31.9 (-126.2, 62.5)   | 0.508   |
| Medical history                   |                      |         |                        |         |
| MI                                | 28.5 (10.4, 46.5)    | 0.002   | 35.3 (-71.3, 141.9)    | 0.516   |
| HF                                | 114.2 (95.7, 132.7)  | <0.001  | 648.8 (539.4, 758.2)   | <0.001  |
| atrial fibrillation/flutter       | 34.2 (4.4, 64.0)     | 0.024   | 232.8 (57.0, 408.7)    | 0.009   |
| PAD                               | 27.7 (-0.5, 56.0)    | 0.054   | 290.0 (123.2, 456.7)   | 0.001   |
| TIA                               | 2.5 (-44.8, 49.9)    | 0.916   | -48.3 (-327.7, 231.2)  | 0.735   |
| ventricular tachycardia           | 82.3 (20.9, 143.6)   | 0.009   | 182.8 (-179.4, 545.0)  | 0.323   |
| stroke                            | 42.7 (10.6, 74.7)    | 0.009   | 105.2 (-84.0, 294.4)   | 0.276   |
| CABG                              | -5.0 (-32.3, 22.4)   | 0.722   | -166.9 (-328.3, -5.5)  | 0.043   |
| implanted pacemaker               | 6.5 (-39.1, 52.1)    | 0.781   | -20.6 (-289.9, 248.8)  | 0.881   |
| carotid disease                   | -28.1 (-74.8, 18.6)  | 0.239   | -120.8 (-396.6, 154.9) | 0.390   |
| hypertension                      | -20.6 (-38.8, -2.3)  | 0.027   | -95.5 (-203.4, 12.4)   | 0.083   |
| Index event                       |                      |         |                        |         |
| STEMI                             | 103.0 (81.2, 124.8)  | <0.001  | 579.6 (451.0, 708.3)   | <0.001  |
| NSTEMI                            | 50.0 (28.8, 71.2)    | <0.001  | 294.5 (169.3, 419.6)   | <0.001  |
| PCI treatment at index ACS        | -41.0 (-56.7, -25.3) | <0.001  | -179.6 (-272.2, -86.9) | <0.001  |
| insulin-treated                   | -12.7 (-29.1, 3.7)   | 0.130   | -17.6 (-114.5, 79.3)   | 0.722   |
| duration of diabetes (yrs)        | -0.1 (-1.1, 1.0)     | 0.900   | -4.6 (-10.7, 1.5)      | 0.137   |
| Retinopathy                       | -12.1 (-37.1, 12.9)  | 0.343   | -68.3 (-215.9, 79.2)   | 0.364   |
| neuropathy                        | -19.3 (-40.0, 1.4)   | 0.068   | -12.6 (-135.0, 109.8)  | 0.840   |
| asthma                            | 0.8 (-42.7, 44.4)    | 0.970   | -46.0 (-303.1, 211.1)  | 0.726   |
| COPD                              | -2.1 (-32.2, 32.9)   | 0.905   | -67.4 (-274.5, 139.7)  | 0.523   |
| HbA1c (%)                         | -3.6 (-9.7, 2.6)     | 0.254   | -51.8 (-88.1, -15.5)   | 0.005   |
| HDL (mg/dl)                       | -10.5 (-37.7, 16.7)  | 0.449   | -91.0 (-251.5, 69.5)   | 0.267   |
| LDL (mg/dl)                       | 1.4 (7.0, 9.7)       | 0.750   | 2.0 (-47.3, 51.2)      | 0.938   |
| eGFR (ml/min/1.73m <sup>2</sup> ) | -1.8 (-2.1, -1.4)    | <0.001  | -14.4 (-16.7, -12.2)   | <0.001  |
| micro vs. Normoalbuminuria        | 67.3 (48.7, 85.9)    | <0.001  | 443.7 (334, 553.4)     | <0.001  |
| macro vs. Normoalbuminuria        | 89.6 (57.6, 121.6)   | <0.001  | 661.0 (472.2, 849.9)   | <0.001  |
| Hemoglobin (g/dL)                 | -21.4 (-27.4, -15.4) | <0.001  | -98.3 (-133.6, -63.1)  | <0.001  |
| Na (mmol/l)                       | 2.4 (-0.2, 4.9)      | 0.072   | -5.1 (-20.3, 10.0)     | 0.506   |
| albumin (g/dl)                    | -13.8 (-16.1, -11.5) | <0.001  | -85.4 (-99.1, -71.8)   | <0.001  |

Table S3. Variables independently associated with BNP/NT-proBNP concentrations, and corresponding  $r^2$  values for regression models with the 5 listed variables

|                                                   | <b>1st</b>                                       | <b>2nd</b>                                                  | <b>3rd</b>                                        | <b>4th</b>                                                            | <b>5th</b>                                                           |
|---------------------------------------------------|--------------------------------------------------|-------------------------------------------------------------|---------------------------------------------------|-----------------------------------------------------------------------|----------------------------------------------------------------------|
| <b>log<sub>2</sub>BNP</b><br>( $r^2=0.20$ )       | <b>Albumin</b><br>( $\chi^2:318$ , coeff:- 0.09) | <b>Age (per 10 years)</b><br>( $\chi^2:316$ , coeff: -0.35) | <b>Prior HF</b><br>( $\chi^2: 312$ , coeff: 0.78) | <b>STEMI</b><br>( $\chi^2:227$ , coeff: 0.57)                         | <b>BMI (per 5 kg/m<sup>2</sup>)</b><br>( $\chi^2:80$ , coeff: -0.15) |
| <b>log<sub>2</sub>NT-proBNP</b><br>( $r^2=0.28$ ) | <b>eGFR</b><br>( $\chi^2:672$ , coeff: 0.27)     | <b>Albumin</b><br>( $\chi^2:527$ , coeff: -0.14)            | <b>STEMI</b><br>( $\chi^2: 381$ , coeff: 0.87)    | <b>BMI (per 5 kg/m<sup>2</sup>)</b><br>( $\chi^2:305$ , coeff: -0.34) | <b>prior HF</b><br>( $\chi^2:262$ , coeff: 0.86)                     |

Table S4. Unadjusted estimates of predictors of outcomes found significant in multivariate models using base variables and BNP (n=5525)

| Outcome                         | 1st                                              | 2nd                                              | 3rd                                            | 4th                                        | 5th                                      |
|---------------------------------|--------------------------------------------------|--------------------------------------------------|------------------------------------------------|--------------------------------------------|------------------------------------------|
| <b>Death</b><br>(397 events)    | <b>log<sub>2</sub>BNP</b><br>HR 1.90 (1.78-2.03) | <b>AF</b><br>HR 2.90 (2.22-3.79)                 | <b>NSTEMI</b><br>HR 1.53 (1.26-1.86)           | <b>Na*</b><br>HR 1.10 (1.05-1.16)          | <b>HR per 10</b><br>HR 1.21 (1.11-1.34)  |
| <b>CV death</b><br>(286 events) | <b>log<sub>2</sub>BNP</b><br>HR 2.01 (1.87-2.17) | <b>HbA1c</b><br>HR 1.23 (1.13-1.34)              | <b>AF</b><br>HR 3.14 (2.31-4.25)               | <b>NSTEMI</b><br>HR 1.61 (1.28-2.04)       | <b>HR per 10</b><br>HR 1.25 (1.12-1.40)  |
| <b>MI</b><br>(473 events)       | <b>prior MI</b><br>HR 2.63 (2.19-3.16)           | <b>log<sub>2</sub>BNP</b><br>HR 1.33 (1.25-1.41) | <b>NSTEMI</b><br>HR 1.90 (1.59-2.28)           | <b>prior stroke</b><br>HR 2.50 (1.89-3.33) | <b>PAD</b><br>HR 2.52 (1.94-3.29)        |
| <b>HF</b><br>(221 events)       | <b>log<sub>2</sub>BNP</b><br>HR 1.96 (1.80-2.14) | <b>BMI per 5</b><br>HR 1.31 (1.19-1.43)          | <b>HR per 10</b><br>HR 1.34 (1.18-1.51)        | <b>prior HF</b><br>HR 4.16 (3.19-5.42)     | <b>prior MI</b><br>HR 3.09 (2.37-4.03)   |
| <b>Stroke</b><br>(115 events)   | <b>log<sub>2</sub>BNP</b><br>HR 1.49 (1.33-1.68) | <b>prior TIA</b><br>HR 4.90 (2.69-8.91)          | <b>macroalbuminuria</b><br>HR 3.05 (1.86-4.99) | <b>Age per 10</b><br>HR 1.61 (1.32-1.95)   | <b>LDL per 10</b><br>HR 1.07 (1.02-1.12) |

Table S5. Unadjusted estimated of predictors of outcomes found significant in multivariate models using base variables and NT-proBNP (n=5525)

| Outcome                         | 1st                                                    | 2nd                                                    | 3rd                                            | 4 <sup>th</sup>                            | 5 <sup>th</sup>                          |
|---------------------------------|--------------------------------------------------------|--------------------------------------------------------|------------------------------------------------|--------------------------------------------|------------------------------------------|
| <b>Death</b><br>(397 events)    | <b>log<sub>2</sub>NT-proBNP</b><br>HR 1.64 (1.56-1.73) | <b>NSTEMI</b><br>HR 1.53 (1.26-1.86)                   | <b>PCI</b><br>HR 0.52 (0.42-0.63)              | <b>DBP#</b><br>HR 1.04 (1.02-1.06)         | <b>Na*</b><br>HR 1.10 (1.05-1.16)        |
| <b>CV death</b><br>(286 events) | <b>log<sub>2</sub>NT-proBNP</b><br>HR 1.72 (1.62-1.83) | <b>HbA1c</b><br>HR 1.23 (1.13-1.34)                    | <b>NSTEMI</b><br>HR 1.61 (1.28-2.04)           | <b>AF</b><br>HR 3.14 (2.31-4.25)           | <b>prior HF</b><br>HR 2.87 (2.27-3.62)   |
| <b>MI</b><br>(473 events)       | <b>prior MI</b><br>HR 2.63 (2.19-3.16)                 | <b>log<sub>2</sub>NT-proBNP</b><br>HR 1.23 (1.18-1.29) | <b>NSTEMI</b><br>HR 1.90 (1.59-2.28)           | <b>prior stroke</b><br>HR 2.50 (1.89-3.33) | <b>PAD</b><br>HR 2.52 (1.94-3.29)        |
| <b>HF</b><br>(221 events)       | <b>log<sub>2</sub>NT-proBNP</b><br>HR 1.68 (1.57-1.80) | <b>BMI per 5</b><br>HR 1.31 (1.19-1.43)                | <b>NSTEMI</b><br>HR 1.91 (1.47-2.49)           | <b>prior HF</b><br>HR 4.16 (3.19-5.42)     | <b>prior MI</b><br>HR 3.09 (2.37-4.03)   |
| <b>Stroke</b><br>(115 events)   | <b>log<sub>2</sub>NT-proBNP</b><br>HR 1.34 (1.22-1.48) | <b>prior TIA</b><br>HR 4.90 (2.69-8.91)                | <b>macroalbuminuria</b><br>HR 3.05 (1.86-4.99) | <b>Age per 10</b><br>HR 1.61 (1.32-1.95)   | <b>LDL per 10</b><br>HR 1.07 (1.02-1.12) |

Table S6. Predictors of outcomes ranked according to  $\chi^2$  value using base variables and BNP and stratified according to history of heart failure (No prior HF, n=4290; Prior HF, n=1235)

| Outcome                         |                    | 1st                                                    | 2nd                                                 | 3rd                                                 |
|---------------------------------|--------------------|--------------------------------------------------------|-----------------------------------------------------|-----------------------------------------------------|
| <b>Death</b><br>(397 events)    | <b>No prior HF</b> | <b>log<sub>2</sub>BNP</b><br>( $\chi^2$ :108, HR 1.68) | <b>HR per 10</b><br>( $\chi^2$ :11, HR 1.24)        | <b>Age per 10</b><br>( $\chi^2$ :9, HR 1.28)        |
|                                 | <b>Prior HF</b>    | <b>log<sub>2</sub>BNP</b><br>( $\chi^2$ :108, HR 1.72) | <b>AF</b><br>( $\chi^2$ :13, HR 1.93)               | <b>Race</b><br>( $\chi^2$ :13, HR 1.42)             |
| <b>CV death</b><br>(286 events) | <b>No prior HF</b> | <b>log<sub>2</sub>BNP</b><br>( $\chi^2$ :101, HR 1.80) | <b>AF</b><br>( $\chi^2$ :12, HR 2.45)               | <b>NSTEMI</b><br>( $\chi^2$ :9, HR 1.64)            |
|                                 | <b>Prior HF</b>    | <b>log<sub>2</sub>BNP</b><br>( $\chi^2$ :95, HR 1.84)  | <b>CABG</b><br>( $\chi^2$ :10, HR 2.03)             | <b>PAD</b><br>( $\chi^2$ :9, HR 1.90)               |
| <b>MI</b><br>(473 events)       | <b>No prior HF</b> | <b>log<sub>2</sub>BNP</b><br>( $\chi^2$ :29, HR 1.23)  | <b>prior MI</b><br>( $\chi^2$ :27, HR 1.86)         | <b>PAD</b><br>( $\chi^2$ :21, HR 2.03)              |
|                                 | <b>Prior HF</b>    | <b>log<sub>2</sub>BNP</b><br>( $\chi^2$ :26, HR 1.34)  | <b>prior MI</b><br>( $\chi^2$ :17, HR 2.10)         | <b>NSTEMI</b><br>( $\chi^2$ :15, HR 2.00)           |
| <b>HF</b><br>(221 events)       | <b>No prior HF</b> | <b>log<sub>2</sub>BNP</b><br>( $\chi^2$ :52, HR 1.70)  | <b>HR per 10</b><br>( $\chi^2$ :22, HR 1.53)        | <b>macroalbuminuria</b><br>( $\chi^2$ :13, HR 2.78) |
|                                 | <b>Prior HF</b>    | <b>log<sub>2</sub>BNP</b><br>( $\chi^2$ :100, HR 1.94) | <b>BMI per 5</b><br>( $\chi^2$ :28, HR 1.39)        | <b>DBP*</b><br>( $\chi^2$ :12, HR 1.06)             |
| <b>Stroke</b><br>(115 events)   | <b>No prior HF</b> | <b>log<sub>2</sub>BNP</b><br>( $\chi^2$ :15, HR 1.40)  | <b>macroalbuminuria</b><br>( $\chi^2$ :12, HR 2.98) | <b>TIA</b><br>( $\chi^2$ :10, HR 3.98)              |
|                                 | <b>Prior HF</b>    | <b>log<sub>2</sub>BNP</b><br>( $\chi^2$ :8, HR 1.31)   | <b>TIA</b><br>( $\chi^2$ :6, HR 2.46)               | <b>MI</b><br>( $\chi^2$ :5, HR 2.20)                |

Hazard ratio's reflect 1 unit changes if nothing else is stated. For log<sub>2</sub>BNP that translates into a doubling of the untransformed BNP concentrations. Macroalbuminuria: >300 mg albumin excretion/24 h. \*per 1 mmHg decrease below  $\geq 75$  mmHg. AF- atrial fibrillation/flutter. NSTEMI – non-ST elevation myocardial infarction at index event. HR – heart rate. PAD – peripheral artery disease. TIA – transient ischemic attack. Duration of T2D is per year since diagnosis. All variables are significant, p<0.05.

Table S7. Discriminatory changes in best risk models with and without BNP stratified according to history of heart failure (No prior HF, n=4290; Prior HF, n=1235)

**C statistics in each model (n=5525)**

|                                 |             | <b>Base model</b> | <b>BNP<br/>in model</b> | <b>NRI</b>         | <b>IDI</b>       |
|---------------------------------|-------------|-------------------|-------------------------|--------------------|------------------|
| <b>Death</b><br>(397 events)    | No prior HF | 0.77 (0.73-0.80)  | 0.80 (0.77-0.84)*       | 25.7% (17.3-34.7)* | 4.0% (2.4-6.8)*  |
|                                 | Prior HF    | 0.69 (0.64-0.73)  | 0.78 (0.75-0.81)*       | 38.5% (28.7-45.4)* | 7.8% (4.4-11.4)* |
| <b>CV death</b><br>(286 events) | No prior HF | 0.76 (0.72-0.80)  | 0.81 (0.77-0.85)*       | 27.4% (17.7-35.6)* | 3.7% (1.9-6.8)*  |
|                                 | Prior HF    | 0.73 (0.68-0.77)  | 0.82 (0.79-0.85)*       | 39.6% (28.6-51.1)* | 6.9% (3.6-11.6)* |
| <b>MI</b><br>(473 events)       | No prior HF | 0.72 (0.69-0.75)  | 0.73 (0.70-0.75)#       | 13.7% (5.6-19.4)*  | 0.8% (0.2-1.9)*  |
|                                 | Prior HF    | 0.71 (0.66-0.76)  | 0.73 (0.68-0.77)        | 21.7% (8.4-30.9)*  | 2.4% (0.9-4.7)*  |
| <b>HF</b><br>(221 events)       | No prior HF | 0.83 (0.79-0.87)  | 0.86 (0.83-0.90)*       | 29.4% (15.3-39.4)* | 3.4% (1.4-6.7)*  |
|                                 | Prior HF    | 0.75 (0.71-0.80)  | 0.81 (0.77-0.85)*       | 38.8% (26.6-46.6)* | 9.0% (5.1-13.3)* |
| <b>Stroke</b><br>(115 events)   | No prior HF | 0.76 (0.71-0.82)  | 0.79 (0.73-0.84)        | 17.6% (1.8-31.1)*  | 0.1% (-0.6-1.6)  |
|                                 | Prior HF    | 0.67 (0.58-0.75)  | 0.69 (0.61-0.76)        | 21.3% (0.0-35.2)*  | 1.0% (0.1-3.9)*  |

\*p<0.05, comparison between base model and BNP model. #p=0.053, comparison between base model and BNP model. NRI – Net Reclassification Index. IDI – Integrated Discrimination Index. NRI and IDI summarized as mean percent improvement ±95% CI..



Table S8. Discriminatory changes in best risk models without BNP compared to BNP alone, in all patients (n=5525) and stratified according to history of heart failure (No prior HF, n=4290; Prior HF, n=1235).

| Outcome                         | All patients            |                   | No prior HF             |                   | Prior HF         |                          |
|---------------------------------|-------------------------|-------------------|-------------------------|-------------------|------------------|--------------------------|
|                                 | Base model              | BNP               | Base model              | BNP               | Base model       | BNP                      |
| <b>Death</b><br>(397 events)    | 0.77 (0.74-0.79)        | 0.77 (0.75-0.80)  | 0.77 (0.74-0.80)        | 0.75 (0.71-0.78)  | 0.71 (0.67-0.74) | <b>0.76 (0.73-0.80)*</b> |
| <b>CV death</b><br>(286 events) | 0.77 (0.74-0.80)        | 0.79 (0.76-0.82)  | 0.76 (0.72-0.80)        | 0.76 (0.72-0.81)  | 0.73 (0.68-0.77) | 0.78 (0.74-0.82)         |
| <b>MI</b><br>(473 events)       | <b>0.71 (0.68-0.73)</b> | 0.63 (0.61-0.66)* | <b>0.72 (0.69-0.75)</b> | 0.62 (0.59-0.65)* | 0.71 (0.66-0.76) | 0.66 (0.61-0.70)         |
| <b>HF</b><br>(221 events)       | <b>0.84 (0.81-0.86)</b> | 0.78 (0.75-0.81)* | <b>0.83 (0.79-0.87)</b> | 0.76 (0.72-0.80)* | 0.75 (0.71-0.80) | 0.74 (0.69-0.78)         |
| <b>Stroke</b><br>(115 events)   | <b>0.75 (0.70-0.79)</b> | 0.67 (0.62-0.72)* | <b>0.76 (0.71-0.82)</b> | 0.67 (0.60-0.74)* | 0.67 (0.58-0.75) | 0.61 (0.52-0.70)         |

\*p<0.05, significant difference between base model compared to BNP model.

Table S9. Predictors of outcomes ranked according to  $\chi^2$  value using base variables and BNP in patients without prior CV disease (n=2899)

| Outcome                        | 1st                                                   | 2nd                                                 | 3rd                                                |
|--------------------------------|-------------------------------------------------------|-----------------------------------------------------|----------------------------------------------------|
| <b>Death</b><br>(112 events)   | <b>log<sub>2</sub>BNP</b><br>( $\chi^2$ :81, HR 1.78) | <b>DBP*</b><br>( $\chi^2$ :14, HR 1.05)             | <b>Na#</b><br>( $\chi^2$ :7, HR 0.84)              |
| <b>CV death</b><br>(74 events) | <b>log<sub>2</sub>BNP</b><br>( $\chi^2$ :81, HR 2.04) | <b>DBP*</b><br>( $\chi^2$ :16, HR 1.06)             | <b>duration of T2D</b><br>( $\chi^2$ :10, HR 1.04) |
| <b>MI</b><br>(153 events)      | <b>log<sub>2</sub>BNP</b><br>( $\chi^2$ :18, HR 1.27) | <b>macroalbuminuria</b><br>( $\chi^2$ :12, HR 2.34) | <b>hypertension</b><br>( $\chi^2$ :10, HR 1.89)    |
| <b>HF</b><br>(39 events)       | <b>log<sub>2</sub>BNP</b><br>( $\chi^2$ :31, HR 1.87) | <b>duration of T2D</b><br>( $\chi^2$ :13, HR 1.06)  | <b>albumin</b><br>( $\chi^2$ :6, HR 0.91)          |
| <b>Stroke</b><br>(31 events)   | <b>carotid disease</b><br>( $\chi^2$ :41, HR 34.79)   | <b>microalbuminuria</b><br>( $\chi^2$ :16, HR 5.08) | <b>DBP*</b><br>( $\chi^2$ :16, HR 1.09)            |

Hazard ratio's reflect 1 unit changes if nothing else is stated. For log<sub>2</sub>BNP that translates into a doubling of the untransformed BNP concentrations. Microalbuminuria  $\geq$ 30-300 mg albumin excretion/24h. Macroalbuminuria: >300 mg albumin excretion/24h.. \*per 1 mmHg decrease below  $\geq$ 75 mmHg.. T2D – Type 2 diabetes (years). All variables are significant, p<0.05.

Table S10. Predictors of outcomes ranked according to  $\chi^2$  value using base variables and NT-proBNP in patients without prior CV disease (n=2899)

| Outcome                        | 1st                                                      | 2nd                                                 | 3rd                                                |
|--------------------------------|----------------------------------------------------------|-----------------------------------------------------|----------------------------------------------------|
| <b>Death</b><br>(112 events)   | <b>log<sub>2</sub>proBNP</b><br>( $\chi^2$ :81, HR 1.61) | <b>DBP*</b><br>( $\chi^2$ :16, HR 1.05)             | <b>age per 10</b><br>( $\chi^2$ :8, HR 1.36)       |
| <b>CV death</b><br>(74 events) | <b>log<sub>2</sub>proBNP</b><br>( $\chi^2$ :81, HR 1.81) | <b>DBP*</b><br>( $\chi^2$ :16, HR 1.06)             | <b>duration of T2D</b><br>( $\chi^2$ :10, HR 1.04) |
| <b>MI</b><br>(153 events)      | <b>log<sub>2</sub>proBNP</b><br>( $\chi^2$ :18, HR 1.21) | <b>macroalbuminuria</b><br>( $\chi^2$ :11, HR 2.23) | <b>hypertension</b><br>( $\chi^2$ :10, HR 1.92)    |
| <b>HF</b><br>(39 events)       | <b>log<sub>2</sub>proBNP</b><br>( $\chi^2$ :53, HR 1.91) | <b>duration of T2D</b><br>( $\chi^2$ :14, HR 1.06)  | <b>NSTEMI</b><br>( $\chi^2$ :5, HR 2.06)           |
| <b>Stroke</b><br>(31 events)   | <b>carotid disease</b><br>( $\chi^2$ :37, HR 29.09)      | <b>microalbuminuria</b><br>( $\chi^2$ :16, HR 5.06) | <b>DBP*</b><br>( $\chi^2$ :15, HR 1.08)            |

Hazard ratio's reflect 1 unit changes if nothing else is stated. For log<sub>2</sub>BNP that translates into a doubling of the untransformed BNP concentrations. Microalbuminuria  $\geq$ 30-300 mg albumin excretion/24h. Macroalbuminuria: >300 mg albumin excretion/24h. DBP\* diastolic blood pressure per 1 mmHg decrease below  $\geq$ 75 mmHg. NSTEMI – non-ST elevation myocardial infarction at index event. T2D – Type 2 diabetes (years). All variables are significant, p<0.05.

Table S11. Predictors of outcomes ranked according to  $\chi^2$  value using base variables and BNP with and without adding information on LVEF (n=3390)

| Outcome                         | 1st                    | 2nd                                                    | 3rd                                                |                                                       |
|---------------------------------|------------------------|--------------------------------------------------------|----------------------------------------------------|-------------------------------------------------------|
| <b>Death</b><br>(236 events)    | <b>Variables</b>       | <b>log<sub>2</sub>BNP</b><br>( $\chi^2$ :99, HR 1.60)  | <b>Duration of T2D</b><br>( $\chi^2$ :17, HR 1.03) | <b>male</b><br>( $\chi^2$ :9, HR 1.59)                |
|                                 | <b>Variables +LVEF</b> | <b>log<sub>2</sub>BNP</b><br>( $\chi^2$ :108, HR 1.60) | <b>Duration of T2D</b><br>( $\chi^2$ :17, HR 1.03) | <b>male</b><br>( $\chi^2$ :9, HR 1.59)                |
| <b>CV death</b><br>(166 events) | <b>Variables</b>       | <b>log<sub>2</sub>BNP</b><br>( $\chi^2$ :131, HR 1.86) | <b>HbA1c</b><br>( $\chi^2$ :10, HR 1.22)           | <b>Duration of T2D</b><br>( $\chi^2$ :10, HR 1.03)    |
|                                 | <b>Variables +LVEF</b> | <b>log<sub>2</sub>BNP</b><br>( $\chi^2$ :95, HR 1.79)  | <b>HbA1c</b><br>( $\chi^2$ :11, HR 1.23)           | <b>Duration of T2D</b><br>( $\chi^2$ :10, HR 1.03)    |
| <b>MI</b><br>(290 events)       | <b>Variables</b>       | <b>prior MI</b><br>( $\chi^2$ :43, HR 2.21)            | <b>NSTEMI</b><br>( $\chi^2$ :24, HR 1.81)          | <b>log<sub>2</sub>BNP</b><br>( $\chi^2$ :23, HR 1.21) |
|                                 | <b>Variables +LVEF</b> | <b>prior MI</b><br>( $\chi^2$ :43, HR 2.21)            | <b>NSTEMI</b><br>( $\chi^2$ :24, HR 1.81)          | <b>log<sub>2</sub>BNP</b><br>( $\chi^2$ :23, HR 1.21) |
| <b>HF</b><br>(148 events)       | <b>Variables</b>       | <b>log<sub>2</sub>BNP</b><br>( $\chi^2$ :97, HR 1.80)  | <b>BMI per 5</b><br>( $\chi^2$ :25, HR 1.33)       | <b>HR per 10</b><br>( $\chi^2$ :20, HR 1.43)          |
|                                 | <b>Variables +LVEF</b> | <b>log<sub>2</sub>BNP</b><br>( $\chi^2$ :97, HR 1.80)  | <b>BMI per 5</b><br>( $\chi^2$ :25, HR 1.33)       | <b>HR per 10</b><br>( $\chi^2$ :20, HR 1.43)          |
| <b>Stroke</b><br>(70 events)    | <b>Variables</b>       | <b>log<sub>2</sub>BNP</b><br>( $\chi^2$ :21, HR 1.42)  | <b>TIA</b><br>( $\chi^2$ :11, HR 3.59)             | <b>LDL per 10</b><br>( $\chi^2$ :7, HR 1.08)          |
|                                 | <b>Variables +LVEF</b> | <b>log<sub>2</sub>BNP</b><br>( $\chi^2$ :21, HR 1.42)  | <b>TIA</b><br>( $\chi^2$ :11, HR 3.59)             | <b>LDL per 10</b><br>( $\chi^2$ :7, HR 1.08)          |

Table S12. Predictors of outcomes ranked according to  $\chi^2$  value using base variables and NT-proBNP with and without adding information on LVEF at index ACS (n=3390)

| Outcome                         |                        | 1st                                                          | 2nd                                                         | 3rd                                          |
|---------------------------------|------------------------|--------------------------------------------------------------|-------------------------------------------------------------|----------------------------------------------|
| <b>Death</b><br>(236 events)    | <b>Variables</b>       | <b>log<sub>2</sub>NT-proBNP</b><br>( $\chi^2$ :107, HR 1.46) | <b>COPD</b><br>( $\chi^2$ :9, HR 1.81)                      | <b>Male</b><br>( $\chi^2$ :9, HR 1.58)       |
|                                 | <b>Variables +LVEF</b> | <b>log<sub>2</sub>NT-proBNP</b><br>( $\chi^2$ :107, HR 1.46) | <b>COPD</b><br>( $\chi^2$ :9, HR 1.81)                      | <b>Male</b><br>( $\chi^2$ :9, HR 1.58)       |
| <b>CV death</b><br>(166 events) | <b>Variables</b>       | <b>log<sub>2</sub>NT-proBNP</b><br>( $\chi^2$ :115, HR 1.57) | <b>HbA1c</b><br>( $\chi^2$ :14, HR 1.27)                    | <b>Male</b><br>( $\chi^2$ :9, HR 1.71)       |
|                                 | <b>Variables +LVEF</b> | <b>log<sub>2</sub>NT-proBNP</b><br>( $\chi^2$ :68, HR 1.49)  | <b>HbA1c</b><br>( $\chi^2$ :13, HR 1.26)                    | <b>AF</b><br>( $\chi^2$ :10, HR 1.92)        |
| <b>MI</b><br>(290 events)       | <b>Variables</b>       | <b>prior MI</b><br>( $\chi^2$ :44, HR 2.24)                  | <b>log<sub>2</sub>NT-proBNP</b><br>( $\chi^2$ :30, HR 1.18) | <b>NSTEMI</b><br>( $\chi^2$ :25, HR 1.18)    |
|                                 | <b>Variables +LVEF</b> | <b>prior MI</b><br>( $\chi^2$ :44, HR 2.24)                  | <b>log<sub>2</sub>NT-proBNP</b><br>( $\chi^2$ :30, HR 1.18) | <b>NSTEMI</b><br>( $\chi^2$ :25, HR 1.18)    |
| <b>HF</b><br>(148 events)       | <b>Variables</b>       | <b>log<sub>2</sub>NT-proBNP</b><br>( $\chi^2$ :86, HR 1.56)  | <b>BMI per 5</b><br>( $\chi^2$ :25, HR 1.33)                | <b>CABG</b><br>( $\chi^2$ :19, HR 2.48)      |
|                                 | <b>Variables +LVEF</b> | <b>log<sub>2</sub>NT-proBNP</b><br>( $\chi^2$ :86, HR 1.56)  | <b>BMI per 5</b><br>( $\chi^2$ :25, HR 1.33)                | <b>CABG</b><br>( $\chi^2$ :19, HR 2.48)      |
| <b>Stroke</b><br>(70 events)    | <b>Variables</b>       | <b>log<sub>2</sub>NT-proBNP</b><br>( $\chi^2$ :14, HR 1.26)  | <b>TIA</b><br>( $\chi^2$ :10, HR 3.36)                      | <b>LDL per 10</b><br>( $\chi^2$ :6, HR 1.07) |
|                                 | <b>Variables +LVEF</b> | <b>log<sub>2</sub>NT-proBNP</b><br>( $\chi^2$ :14, HR 1.26)  | <b>TIA</b><br>( $\chi^2$ :10, HR 3.36)                      | <b>LDL per 10</b><br>( $\chi^2$ :6, HR 1.07) |

Table S13. Discriminatory changes in best risk models with and without BNP and NT-proBNP with LVEF and coronary intervention procedure added to base model

**C statistics in each model (n=3390)**

|                                 |           | <b>Base model</b> | <b>BNP/<br/>NT-proBNP in<br/>model</b> | <b>NRI</b>         | <b>IDI</b>      |
|---------------------------------|-----------|-------------------|----------------------------------------|--------------------|-----------------|
| <b>Death</b><br>(236 events)    | BNP       | 0.75 (0.72-0.78)  | 0.79 (0.76-0.82)*                      | 31.8% (25.1-37.4)* | 5.3% (3.5-7.4)* |
|                                 | NT-proBNP |                   | 0.79 (0.75-0.82)*                      | 25.5% (19.4-31.9)* | 3.5% (2.3-5.1)* |
| <b>CV death</b><br>(166 events) | BNP       | 0.77 (0.73-0.81)  | 0.83 (0.80-0.86)*                      | 34.8% (28.0-41.7)* | 5.7% (3.7-8.4)* |
|                                 | NT-proBNP |                   | 0.82 (0.79-0.85)*                      | 29.9% (22.4-36.8)* | 3.9% (2.3-6.2)* |
| <b>MI</b><br>(290 events)       | BNP       | 0.70 (0.67-0.73)  | 0.71 (0.67-0.74)                       | 14.3% (9.3-19.5)*  | 1.2% (0.6-2.1)* |
|                                 | NT-proBNP |                   | 0.71 (0.68-0.74)                       | 10.6% (5.7-16.6)*  | 0.8% (0.3-1.6)* |
| <b>HF</b><br>(148 events)       | BNP       | 0.86 (0.83-0.89)  | 0.88 (0.85-0.90)*                      | 35.4% (24.7-40.6)* | 5.0% (3.0-7.6)* |
|                                 | NT-proBNP |                   | 0.88 (0.85-0.90)*                      | 29.9% (21.8-36.6)* | 3.8% (2.2-5.8)* |
| <b>Stroke</b><br>(70 events)    | BNP       | 0.72 (0.66-0.78)  | 0.76 (0.70-0.82)                       | 19.3% (8.8-29.9)*  | 0.4% (0-1.2)    |
|                                 | NT-proBNP |                   | 0.75 (0.70-0.81)                       | 17.2% (6.3-28.1)*  | 0.2% (0-0.8)    |

\*p<0.05, comparison between base model and /NT-proBNP model. NRI – Net Reclassification Index. IDI – Integrated Discrimination Index. NRI and IDI summarized as mean percent improvement ±95% CI.

Myocardial infarction summary criteria for positive adjudication:

Spontaneous MI: Elevated cardiac markers (CM) and either new electrocardiographic (ECG) changes or a clinical presentation consistent with an acute MI.

○PCI-related MI: Elevated CM (or other criteria in the absence of elevated CM).

○Coronary artery bypass graft (CABG)–related MI: Elevated CM and new ECG changes (or other criteria).

Detailed criteria for positive adjudication:

a. Spontaneous MI:

Cardiac markers:

○Troponin<sub>p</sub> > upper limit of normal (ULN) or

○CK-MB > ULN

and at least 1 of the following:

○Ischemic symptoms: rest or accelerated symptoms (pain, dyspnea, and pressure) consistent with myocardial ischemia.

○ECG changes consistent with infarction:

•New significant Q waves (or R waves in V<sub>1</sub>-V<sub>2</sub>) in 2 contiguous leads in absence of previous left ventricular hypertrophy or conduction abnormalities. OR

•Evolving ST-segment to T-wave changes in ≥2 contiguous leads.

•Development of new left bundle-branch block.

•ST-segment elevation requiring thrombolytics or PCI.

b. PCI-related MI:

Cardiac markers<sub>q</sub>:

1. Assuming baseline value > ULN

2. Within 48 hours of procedure

a. Troponin<sub>p</sub> > 3 × ULN OR

b. CK-MB > 3 × ULN

c. CABG-related MI:

Cardiac markers:

1. Assuming baseline value > ULN

2. Within 72 hours of procedure

a. Troponin<sub>p</sub> > 5 × ULN OR

b. CK-MB > 5 × ULN

AND

c. New pathologic Q waves or left bundle-branch block, new native or graft vessel occlusion, or imaging evidence of loss of viable myocardium.

3. Hospitalization for UA

a. Unplanned hospitalization for worsening angina defined as rest or accelerated symptoms (pain, dyspnea, and pressure) consistent with myocardial ischemia AND

b. Cardiac markers (CK-MB or troponin) suggestive of myocardial injury but not meeting MI

criteria. Note: if abnormal troponin, value must be in the suggestive (middle) range and below the threshold for MI.

Baseline variables used in risk models:

$\text{Log}_2\text{BNP}$ ,  $\text{Log}_2\text{NT-proBNP}$

Race, ethnicity, region, randomization to lixisenatide, PCI at index ACS, age, gender, BMI, systolic blood pressure, diastolic blood pressure (above/below 70 mmHg), heart rate, smoking (current/never/former), history of MI, history of HF, history of AF, history of PAD, history of TIA, history of stroke, history of ventr. tachycardia, history of CABG, pacemaker implanted, carotid disease, history of hypertension, index ACS (STEMI, NSTEMI, UAP), insulin use (yes/no), duration of T2D, retinopathy, neuropathy, asthma, COPD, albuminuria (no/micro/macro), logCRP, HbA1c, HDL, LDL, eGFR, Hgb, Na (above/below 140 mmol/L), albumin.



Figure S1. The association of BNP concentrations and risk of all-cause death according to history of heart failure

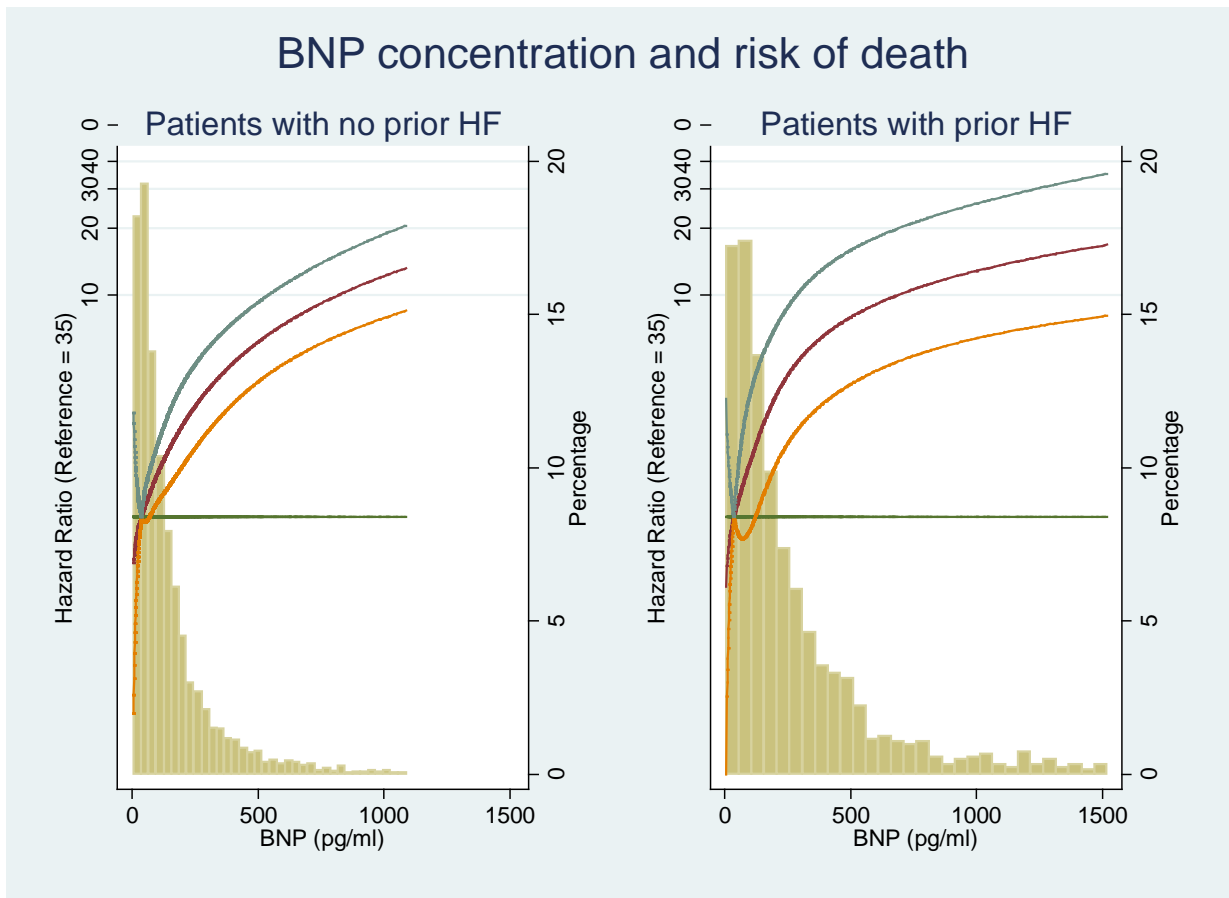

The hazard of death is depicted with 95% CI. The Cox spline model was fully adjusted for all significant variables. The reference of HR=1.0 corresponds to a BNP concentration of 35 pg/ml.
